# Supplementary material
Source: PubMed Central journal article supplement (PMC7499365)

Supplementary Table S1. Incidence of Cardiac Injury in Hospitalized COVID-19 Patients

| Study          | Total Number of Patients (n) | Death (n)    | Total Cardiac Injury (n) | Cardiac Injury Incidence (%) | Injury: Primary Outcome (n) | No Injury: Primary Outcome (n) | Injury: Secondary Outcome (n) | No Injury: Secondary Outcome (n) | Total Primary or Secondary Outcomes (n) |
|----------------|------------------------------|--------------|--------------------------|------------------------------|-----------------------------|--------------------------------|-------------------------------|----------------------------------|-----------------------------------------|
| Chen T. et al  | 203                          | 113          | 89                       | 44.0                         | 72                          | 22                             | 72                            | 22                               | 94                                      |
| Deng et al     | 225                          | 109          | 66                       | 29.3                         | 65                          | 44                             | 65                            | 44                               | 109                                     |
| Yang et al     | 52                           | 32           | 12                       | 23.1                         | 9                           | 23                             | 9                             | 23                               | 32                                      |
| Ni et al       | 176                          | 60           | 49                       | 27.8                         | 35                          | 25                             | 35                            | 25                               | 60                                      |
| Aggarwal et al | 16                           | 3            | 3                        | 18.8                         | N/A                         | N/A                            | N/A                           | N/A                              | N/A                                     |
| Cecconi et al  | 206                          | 36           | 57                       | 27.7                         | N/A                         | N/A                            | N/A                           | N/A                              | N/A                                     |
| Zhou F. et al  | 191                          | 54           | 33                       | 17.3                         | 32                          | 22                             | 32                            | 22                               | 54                                      |
| Huang et al    | 41                           | 6            | 5                        | 12.2                         | N/A                         | N/A                            | 4                             | 9                                | 13                                      |
| Zheng Y. et al | 34                           | 0            | 13                       | 38.2                         | N/A                         | N/A                            | 10                            | 5                                | 15                                      |
| Wang et al     | 138                          | 6            | 10                       | 7.2                          | N/A                         | N/A                            | 8                             | 28                               | 36                                      |
| Chen C. et al  | 150                          | 11           | 22                       | 14.7                         | N/A                         | N/A                            | 15                            | 9                                | 24                                      |
| Zhou B. et al  | 34                           | Not reported | 9                        | 26.5                         | N/A                         | N/A                            | 8                             | 0                                | 8                                       |
| He et al       | 54                           | 26           | 24                       | 44.4                         | 18                          | 8                              | 18                            | 8                                | 26                                      |
| Guo et al      | 187                          | 43           | 52                       | 27.8                         | 31                          | 12                             | 31                            | 12                               | 43                                      |
| Wei et al      | 101                          | 3            | 16                       | 15.8                         | 3                           | 0                              | 3                             | 0                                | 3                                       |
| Shi et al      | 416                          | 57           | 82                       | 19.7                         | 42                          | 15                             | 42                            | 15                               | 57                                      |
| <b>Overall</b> | <b>2224</b>                  | <b>559</b>   | <b>542</b>               | <b>24.4</b>                  | <b>307</b>                  | <b>171</b>                     | <b>352</b>                    | <b>222</b>                       | <b>574</b>                              |

Supplementary Figure S1. Funnel Plots of Studies Included in the Primary (A) and Secondary Outcomes (B) Analysis. The distribution of effect sizes of studies included in both analyses were distributed symmetrically.

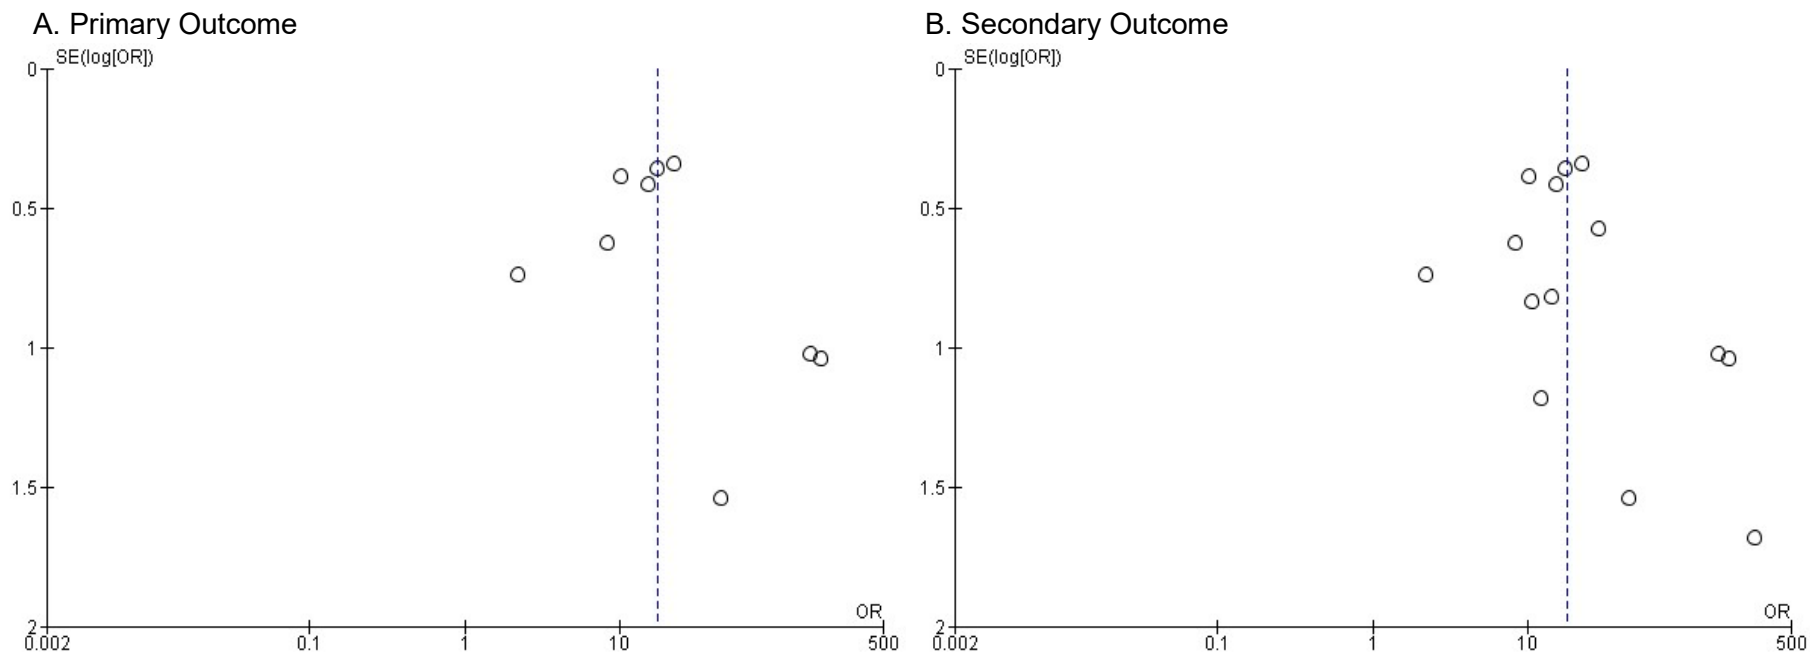

Supplement: mmc1.pdf [file mmc1.pdf]
